# Supplementary material for: The projections of global and regional rheumatic heart disease burden from 2020 to 2030
Source: PubMed Central journal article supplement (PMC9622772; doi:10.3389/fcvm.2022.941917), 2022-10-18
Supplement: Data_Sheet_1.pdf [file Data_Sheet_1.pdf]

## ***Supplemental Material***

### **Section 1: Table S1-S6**

**Table S1.** Checklist of accurate and transparent global health estimates reporting (ie. GATHER checklist), related to STAR Methods.

**Table S2.** The prediction accuracy validation of Bayesian age-period-cohort model (<0.1 means acceptable).

**Table S3.** The cases of RHD-related burden in 1990, 2020 and 2030.

**Table S4.** The RHD-related ASIRs in 1990 and 2019, and its temporal trends from 1990 to 2019.

**Table S5.** The RHD-related ASMRs in 1990, 2020 and 2030, and its temporal trends from 1990 to 2019 and from 2020 to 2030.

**Table S6.** The RHD-related ASPRs of HF in 1990, 2020 and 2030, and its temporal trends from 1990 to 2019 and from 2020 to 2030.

### **Section 2: Figure S1-S4**

**Figure S1.** The RHD-related disease burden at the global level, in different SDI regions and in 21 GBD regions. (A) The ASPRs in 1990, 2019, and 2030. (B) The ASIRs in 1990 and 2019. (C) The ASMRs in 1990, 2019, and 2030. (D) The ASPRs of HF in 1990, 2019, and 2030.

**Figure S2.** The RHD-related disease burden at the global level, in different SDI regions and in 21 GBD regions by sex. (A) The ASPRs in 1990, 2019, and 2030. (B) The ASMRs in 1990, 2019, and 2030. (C) The ASPRs of HF in 1990, 2019, and 2030.

**Figure S3.** The change trends of the RHD-related disease burden at the global level, in different SDI regions and in 21 GBD regions by sex. (A) The EAPCs in ASPR between 1990-2019 and 2020-2030. (B) The EAPCs in ASMR between 1990-2019 and 2020-2030. (C) The EAPCs in ASPR of HF between 1990-2019 and 2020-2030.

**Figure S4.** The ASPRs of RHD-related HF in 1990, 2019 and 2030 at the global level and in different SDI regions by age.

**Table S1.** Checklist of accurate and transparent global health estimates reporting (ie. GATHER checklist), related to STAR Methods.

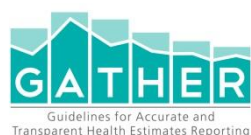

**Checklist of information that should be included in new reports of global health estimates**

| Item #                                                                                                | Checklist item                                                                                                                                                                                                                                                                                                                                                                            | Reported on page #                                                                                                                                                                                       |
|-------------------------------------------------------------------------------------------------------|-------------------------------------------------------------------------------------------------------------------------------------------------------------------------------------------------------------------------------------------------------------------------------------------------------------------------------------------------------------------------------------------|----------------------------------------------------------------------------------------------------------------------------------------------------------------------------------------------------------|
| <b>Objectives and funding</b>                                                                         |                                                                                                                                                                                                                                                                                                                                                                                           |                                                                                                                                                                                                          |
| 1                                                                                                     | Define the indicator(s), populations (including age, sex, and geographic entities), and time period(s) for which estimates were made.                                                                                                                                                                                                                                                     | Page 2-4.<br>MATERIALS AND METHODS                                                                                                                                                                       |
| 2                                                                                                     | List the funding sources for the work.                                                                                                                                                                                                                                                                                                                                                    | Page 8-9.<br>ACKNOWLEDGMENTS                                                                                                                                                                             |
| <b>Data Inputs</b>                                                                                    |                                                                                                                                                                                                                                                                                                                                                                                           |                                                                                                                                                                                                          |
| <i>For all data inputs from multiple sources that are synthesized as part of the study:</i>           |                                                                                                                                                                                                                                                                                                                                                                                           |                                                                                                                                                                                                          |
| 3                                                                                                     | Describe how the data were identified and how the data were accessed.                                                                                                                                                                                                                                                                                                                     | Page 2-3. Study Data and Definitions                                                                                                                                                                     |
| 4                                                                                                     | Specify the inclusion and exclusion criteria. Identify all ad-hoc exclusions.                                                                                                                                                                                                                                                                                                             | Page 2-4.<br>MATERIALS AND METHODS                                                                                                                                                                       |
| 5                                                                                                     | Provide information on all included data sources and their main characteristics. For each data source used, report reference information or contact name/institution, population represented, data collection method, year(s) of data collection, sex and age range, diagnostic criteria or measurement method, and sample size, as relevant.                                             | Page 2-4.<br>MATERIALS AND METHODS                                                                                                                                                                       |
| 6                                                                                                     | Identify and describe any categories of input data that have potentially important biases (e.g., based on characteristics listed in item 5).                                                                                                                                                                                                                                              | Page 6-8.<br>DISCUSSION                                                                                                                                                                                  |
| <i>For data inputs that contribute to the analysis but were not synthesized as part of the study:</i> |                                                                                                                                                                                                                                                                                                                                                                                           |                                                                                                                                                                                                          |
| 7                                                                                                     | Describe and give sources for any other data inputs.                                                                                                                                                                                                                                                                                                                                      | Page 2. We only used data collected from GBD. Available via online data source tools ( <a href="http://ghdx.healthdata.org/gbd-results-tool">http://ghdx.healthdata.org/gbd-results-tool</a> ).          |
| <i>For all data inputs:</i>                                                                           |                                                                                                                                                                                                                                                                                                                                                                                           |                                                                                                                                                                                                          |
| 8                                                                                                     | Provide all data inputs in a file format from which data can be efficiently extracted (e.g., a spreadsheet rather than a PDF), including all relevant meta-data listed in item 5. For any data inputs that cannot be shared because of ethical or legal reasons, such as third-party ownership, provide a contact name or the name of the institution that retains the right to the data. | Page 2. Available via online data source tools ( <a href="http://ghdx.healthdata.org/gbd-results-tool">http://ghdx.healthdata.org/gbd-results-tool</a> ). We do not have any data that cannot be shared. |
| <b>Data analysis</b>                                                                                  |                                                                                                                                                                                                                                                                                                                                                                                           |                                                                                                                                                                                                          |

|                               |                                                                                                                                                                                                                                                                         |                                                                  |
|-------------------------------|-------------------------------------------------------------------------------------------------------------------------------------------------------------------------------------------------------------------------------------------------------------------------|------------------------------------------------------------------|
| <b>9</b>                      | Provide a conceptual overview of the data analysis method. A diagram may be helpful.                                                                                                                                                                                    | Page 3-4. Statistical Analysis and Forecasting Model Development |
| <b>10</b>                     | Provide a detailed description of all steps of the analysis, including mathematical formulae. This description should cover, as relevant, data cleaning, data pre-processing, data adjustments and weighting of data sources, and mathematical or statistical model(s). | Page 3-4. Statistical Analysis and Forecasting Model Development |
| <b>11</b>                     | Describe how candidate models were evaluated and how the final model(s) were selected.                                                                                                                                                                                  | Page 3-4. Statistical Analysis and Forecasting Model Development |
| <b>12</b>                     | Provide the results of an evaluation of model performance, if done, as well as the results of any relevant sensitivity analysis.                                                                                                                                        | Page 3-4. Statistical Analysis and Forecasting Model Development |
| <b>13</b>                     | Describe methods for calculating uncertainty of the estimates. State which sources of uncertainty were, and were not, accounted for in the uncertainty analysis.                                                                                                        | Page 3-4. Statistical Analysis and Forecasting Model Development |
| <b>14</b>                     | State how analytic or statistical source code used to generate estimates can be accessed.                                                                                                                                                                               | Page 3-4. Statistical Analysis and Forecasting Model Development |
| <b>Results and Discussion</b> |                                                                                                                                                                                                                                                                         |                                                                  |
| <b>15</b>                     | Provide published estimates in a file format from which data can be efficiently extracted.                                                                                                                                                                              | No published estimates were used in our analysis.                |
| <b>16</b>                     | Report a quantitative measure of the uncertainty of the estimates (e.g. uncertainty intervals).                                                                                                                                                                         | Page 4-6. RESULTS                                                |
| <b>17</b>                     | Interpret results in light of existing evidence. If updating a previous set of estimates, describe the reasons for changes in estimates.                                                                                                                                | Page 6-8. DISCUSSION                                             |
| <b>18</b>                     | Discuss limitations of the estimates. Include a discussion of any modelling assumptions or data limitations that affect interpretation of the estimates.                                                                                                                | Page 6-8. DISCUSSION                                             |

*This checklist should be used in conjunction with the GATHER statement and Explanation and Elaboration document, found on [gather-statement.org](http://gather-statement.org)*

**Table S2.** The prediction accuracy validation of the Bayesian age-period-cohort model (<0.1 means acceptable).

|                 | <b>Prevalence</b> | <b>Death</b> | <b>Impairment</b> |
|-----------------|-------------------|--------------|-------------------|
| Global          | 0.005             | 0.029        | 0.007             |
| High SDI        | 0.040             | 0.016        | 0.008             |
| High-middle SDI | 0.021             | 0.091        | 0.007             |
| Middle SDI      | 0.005             | 0.020        | 0.014             |
| Low-middle      | 0.014             | 0.035        | 0.004             |
| Low SDI         | 0.005             | 0.007        | 0.001             |

SDI, socio-demographic index.

**Table S3.** The cases of RHD-related burden in 1990, 2020 and 2030.

| <b>Characteristics</b> | <b>Cases in 1990</b>        | <b>Cases in 2020</b>        | <b>Cases in 2030</b>        |
|------------------------|-----------------------------|-----------------------------|-----------------------------|
|                        | <b>No. (95% UI)</b>         | <b>No. (95% CI)</b>         | <b>No. (95% CI)</b>         |
| <b>Prevalence</b>      |                             |                             |                             |
| Global                 | 23756847(18791683,29295709) | 41688269(41018266,42358273) | 48549858(45697036,51402680) |
| High SDI               | 840286(724963,955410)       | 1267502(1226391,1308614)    | 1556905(1387021,1726788)    |
| High-middle SDI        | 3363720(2838208,3992200)    | 4409521(4353083,4465960)    | 4606852(4337966,4875738)    |
| Middle SDI             | 8671201(6696174,10847101)   | 12669631(12498005,12841257) | 13127031(12425731,13828331) |
| Low-middle SDI         | 6866722(5292949,8602523)    | 13006803(12755577,13258028) | 15557231(14517157,16597304) |
| Low SDI                | 4000024(3058044,5086967)    | 10020956(9957636,10084275)  | 12748736(12138140,13359331) |
| <b>Death</b>           |                             |                             |                             |
| Global                 | 362160(326259,408222)       | 306000(298646,313354)       | 313688(291496,335881)       |
| High SDI               | 27205(25433,28359)          | 24934(24335,25533)          | 27001(23853,30149)          |
| High-middle SDI        | 67300(62547,73392)          | 36743(35689,37796)          | 37917(32219,43614)          |

|                   |                        |                          |                          |
|-------------------|------------------------|--------------------------|--------------------------|
| Middle SDI        | 123159(109843,138933)  | 82140(79193,85087)       | 77272(70242,84302)       |
| Low-middle SDI    | 105970(89332,129005)   | 116183(113261,119105)    | 127156(112885,141426)    |
| Low SDI           | 38395(29963,48956)     | 47869(47060,48677)       | 50605(47393,53818)       |
| <b>Impairment</b> |                        |                          |                          |
| Global            | 996907(766439,1288780) | 2240712(2216756,2264669) | 2922840(2752383,3093297) |
| High SDI          | 195446(143976,255514)  | 296626(288740,304512)    | 345557(315787,375327)    |
| High-middle SDI   | 240692(179649,316406)  | 558772(549990,567555)    | 752526(694502,810550)    |
| Middle SDI        | 319032(244534,411519)  | 801233(788868,813599)    | 1021352(949557,1093148)  |
| Low-middle SDI    | 180061(137241,232610)  | 431323(427517,435129)    | 554166(523343,584989)    |
| Low SDI           | 61358(45470,81270)     | 144818(143514,146122)    | 194133(184442,203824)    |

RHD, rheumatic heart disease; UI, uncertainty interval; SDI, sociodemographic index.

**Table S4.** The RHD-related ASIRs in 1990 and 2019, and its temporal trends from 1990 to 2019.

|                              | 1990                          | 2019                          | 1990–2019                |
|------------------------------|-------------------------------|-------------------------------|--------------------------|
| Characteristics              | ASIR per 100, 000<br>(95% UI) | ASIR per 100, 000<br>(95% UI) | EAPC of ASIR<br>(95% CI) |
| <b>Global</b>                | 32.69(25.77,40.03)            | 37.40(28.60,46.74)            | 0.58(0.52,0.63)          |
| <b>Sex</b>                   |                               |                               |                          |
| Female                       | 35.54(28.16,43.36)            | 40.57(31.13,50.40)            | 0.63(0.57,0.68)          |
| Male                         | 29.81(23.42,36.73)            | 34.33(26.25,42.88)            | 0.55(0.49,0.60)          |
| <b>SDI</b>                   |                               |                               |                          |
| High SDI                     | 7.04(6.21,7.91)               | 5.86(5.33,6.40)               | -0.58(-0.75,-0.40)       |
| High-middle SDI              | 20.11(16.91,23.69)            | 17.04(13.68,20.68)            | -0.40(-0.50,-0.30)       |
| Middle SDI                   | 31.19(24.06,38.89)            | 30.65(23.37,38.38)            | 0.06(-0.01,0.13)         |
| Low-middle SDI               | 43.86(33.63,54.62)            | 46.91(35.70,58.71)            | 0.29(0.25,0.32)          |
| Low SDI                      | 58.30(44.27,73.70)            | 62.13(46.85,78.27)            | 0.29(0.27,0.31)          |
| <b>Regions</b>               |                               |                               |                          |
| High-income Asia<br>Pacific  | 4.03(3.41,4.64)               | 2.46(2.12,2.81)               | -2.00(-2.11,-1.89)       |
| High-income North<br>America | 9.80(8.28,11.48)              | 9.35(8.50,10.31)              | 0.13(-0.14,0.41)         |
| Western Europe               | 5.66(5.13,6.21)               | 3.90(3.48,4.34)               | -1.45(-1.51,-1.38)       |
| Australasia                  | 5.17(4.67,5.73)               | 3.80(3.37,4.31)               | -1.21(-1.38,-1.03)       |



|                                 |                     |                     |                    |
|---------------------------------|---------------------|---------------------|--------------------|
| Eastern Europe                  | 14.26(12.78,16.00)  | 8.02(7.03,9.07)     | -2.15(-2.26,-2.03) |
| Central Europe                  | 12.18(11.15,13.21)  | 6.45(5.78,7.17)     | -2.14(-2.28,-2.00) |
| Southern Latin<br>America       | 27.25(21.30,33.81)  | 27.86(21.40,34.78)  | 0.09(0.07,0.12)    |
| East Asia                       | 29.31(22.86,36.45)  | 23.85(18.60,29.77)  | -0.49(-0.67,-0.31) |
| Central Asia                    | 38.06(29.56,47.14)  | 38.30(29.32,47.78)  | -0.02(-0.07,0.04)  |
| North Africa and<br>Middle East | 23.75(18.58,29.63)  | 25.61(19.71,31.91)  | 0.25(0.20,0.31)    |
| Southeast Asia                  | 18.50(14.89,22.47)  | 18.52(14.64,22.89)  | 0.03(-0.01,0.07)   |
| Southern Sub-Saharan<br>Africa  | 71.74(53.38,91.51)  | 72.77(54.23,92.50)  | 0.03(0.01,0.04)    |
| Tropical Latin<br>America       | 53.81(40.39,67.44)  | 54.01(40.56,68.35)  | 0.01(0.00,0.02)    |
| Andean Latin<br>America         | 47.91(36.01,60.71)  | 47.96(36.13,60.44)  | 0.00(-0.01,0.01)   |
| Caribbean                       | 45.69(34.42,57.31)  | 49.12(37.16,62.06)  | 0.24(0.23,0.25)    |
| Central Latin America           | 22.91(17.95,28.05)  | 22.63(17.40,28.00)  | -0.08(-0.15,-0.01) |
| South Asia                      | 42.43(31.92,53.24)  | 42.98(32.15,54.22)  | 0.20(0.15,0.25)    |
| Central Sub-Saharan<br>Africa   | 80.20(60.20,102.43) | 81.68(60.58,104.25) | 0.02(-0.02,0.05)   |
| Oceania                         | 37.67(29.17,48.07)  | 40.72(31.80,51.77)  | 0.34(0.27,0.40)    |

|                               |                    |                     |                 |
|-------------------------------|--------------------|---------------------|-----------------|
| Western Sub-Saharan<br>Africa | 53.74(40.60,68.00) | 56.21(42.41,71.26)  | 0.17(0.15,0.20) |
| Eastern Sub-Saharan<br>Africa | 75.75(56.70,96.64) | 80.98(60.90,103.24) | 0.25(0.23,0.26) |

RHD, rheumatic heart disease; ASIRs, age-standardized incidence rates; EAPC, estimated annual percentage change; UI, uncertainty interval; CI, confidence interval; SDI, sociodemographic index.

**Table S5.** The RHD-related ASMRs in 1990, 2020 and 2030, and its temporal trends from 1990 to 2019 and from 2020 to 2030.

|                        | <b>1990</b>                            | <b>2020</b>                            | <b>2030</b>                            | <b>1990–2019</b>                  | <b>2020-2030</b>                  |
|------------------------|----------------------------------------|----------------------------------------|----------------------------------------|-----------------------------------|-----------------------------------|
| <b>Characteristics</b> | <b>ASMRs per 100,<br/>000 (95% UI)</b> | <b>ASMRs per 100,<br/>000 (95% CI)</b> | <b>ASMRs per 100,<br/>000 (95% CI)</b> | <b>EAPC of ASMRs<br/>(95% CI)</b> | <b>EAPC of ASMRs<br/>(95% CI)</b> |
| <b>Global</b>          | 8.94(8.04,10.12)                       | 3.74(3.62,3.87)                        | 2.98(2.27,3.69)                        | -2.98(-3.03,-2.94)                | -2.27(-2.27,-2.26)                |
| <b>Sex</b>             |                                        |                                        |                                        |                                   |                                   |
| Female                 | 9.65(8.53,10.99)                       | 3.95(3.81,4.10)                        | 3.16(2.34,3.98)                        | -3.10(-3.17,-3.03)                | -2.22(-2.23,-2.22)                |
| Male                   | 8.19(6.70,10.00)                       | 3.50(3.38,3.61)                        | 2.77(2.06,3.47)                        | -2.86(-2.89,-2.83)                | -2.32(-2.32,-2.32)                |
| <b>SDI</b>             |                                        |                                        |                                        |                                   |                                   |
| High SDI               | 2.62(2.45,2.73)                        | 1.09(1.06,1.13)                        | 0.90(0.63,1.18)                        | -3.00(-3.21,-2.80)                | -1.92(-1.94,-1.90)                |
| High-middle SDI        | 6.49(6.00,7.10)                        | 1.83(1.75,1.91)                        | 1.40(0.77,2.04)                        | -4.53(-4.68,-4.38)                | -2.61(-2.65,-2.57)                |
| Middle SDI             | 12.35(10.91,14.10)                     | 3.56(3.39,3.72)                        | 2.48(1.81,3.16)                        | -4.08(-4.15,-4.02)                | -3.53(-3.54,-3.51)                |
| Low-middle SDI         | 16.55(13.86,20.38)                     | 8.23(7.91,8.56)                        | 6.70(4.09,9.32)                        | -2.45(-2.54,-2.35)                | -2.04(-2.05,-2.03)                |
| Low SDI                | 14.28(10.83,18.74)                     | 8.23(8.02,8.44)                        | 6.50(5.00,8.00)                        | -1.87(-1.95,-1.78)                | -2.33(-2.35,-2.30)                |

| <b>Regions</b>               |                    |                 |                  |                    |                    |
|------------------------------|--------------------|-----------------|------------------|--------------------|--------------------|
| High-income Asia Pacific     | 1.92(1.75,2.03)    | 0.77(0.74,0.80) | 0.55(0.39,0.71)  | -3.04(-3.11,-2.98) | -3.25(-3.30,-3.19) |
| High-income North America    | 2.34(2.18,2.44)    | 0.98(0.94,1.02) | 0.91(0.50,1.31)  | -3.10(-3.46,-2.74) | -0.82(-0.84,-0.81) |
| Western Europe               | 3.03(2.82,3.17)    | 1.42(1.36,1.47) | 1.10(0.76,1.45)  | -2.52(-2.66,-2.38) | -2.48(-2.52,-2.44) |
| Australasia                  | 2.55(2.34,2.74)    | 1.13(1.04,1.22) | 0.92(0.50,1.35)  | -2.56(-2.80,-2.32) | -2.01(-2.02,-2.00) |
| Eastern Europe               | 4.91(4.56,5.28)    | 1.30(1.14,1.46) | 1.17(-1.34,3.67) | -5.58(-6.10,-5.07) | -1.05(-1.07,-1.03) |
| Central Europe               | 6.11(5.90,6.30)    | 1.26(1.19,1.34) | 0.95(0.37,1.52)  | -5.72(-6.16,-5.27) | -2.85(-2.90,-2.80) |
| Southern Latin America       | 5.89(5.34,6.40)    | 2.11(2.00,2.22) | 1.65(1.05,2.24)  | -3.64(-3.76,-3.52) | -2.46(-2.50,-2.42) |
| East Asia                    | 17.73(15.24,20.79) | 3.87(3.66,4.09) | 2.51(1.54,3.48)  | -5.00(-5.13,-4.88) | -4.24(-4.31,-4.17) |
| Central Asia                 | 7.27(7.00,7.56)    | 4.09(3.82,4.35) | 3.13(0.72,5.53)  | -2.51(-2.84,-2.17) | -2.64(-2.70,-2.59) |
| North Africa and Middle East | 4.50(3.37,6.67)    | 1.60(1.54,1.66) | 1.17(0.75,1.58)  | -3.59(-3.74,-3.43) | -3.11(-3.13,-3.08) |
| Southeast Asia               | 3.67(3.07,4.30)    | 1.25(1.21,1.29) | 0.93(0.62,1.24)  | -3.73(-3.83,-3.63) | -2.89(-2.91,-2.88) |
| Southern Sub-Saharan Africa  | 3.94(3.37,4.43)    | 2.13(1.98,2.29) | 1.63(0.64,2.62)  | -2.03(-2.40,-1.66) | -2.64(-2.65,-2.63) |
| Tropical Latin America       | 2.81(2.66,2.98)    | 1.10(1.06,1.15) | 0.79(0.54,1.04)  | -3.05(-3.15,-2.94) | -3.27(-3.31,-3.23) |

|                            |                    |                    |                   |                    |                    |
|----------------------------|--------------------|--------------------|-------------------|--------------------|--------------------|
| Andean Latin America       | 3.34(2.89,4.00)    | 1.07(1.00,1.15)    | 0.74(0.49,1.00)   | -3.75(-3.85,-3.65) | -3.59(-3.62,-3.57) |
| Caribbean                  | 4.69(3.81,5.74)    | 2.45(2.31,2.58)    | 2.18(1.48,2.88)   | -2.12(-2.28,-1.95) | -1.16(-1.16,-1.16) |
| Central Latin America      | 2.86(2.72,3.00)    | 0.69(0.65,0.73)    | 0.60(0.31,0.90)   | -5.16(-5.39,-4.94) | -1.29(-1.34,-1.25) |
| South Asia                 | 20.67(16.92,26.43) | 11.01(10.51,11.51) | 9.22(4.55,13.88)  | -2.28(-2.44,-2.12) | -1.76(-1.77,-1.75) |
| Central Sub-Saharan Africa | 6.87(4.82,9.29)    | 3.83(3.66,4.00)    | 2.62(1.87,3.37)   | -1.86(-2.08,-1.64) | -3.72(-3.75,-3.68) |
| Oceania                    | 20.45(12.51,32.57) | 15.68(14.85,16.50) | 13.41(8.94,17.88) | -0.64(-0.74,-0.55) | -1.55(-1.56,-1.54) |
| Western Sub-Saharan Africa | 6.42(4.95,8.54)    | 2.36(2.27,2.45)    | 1.76(1.21,2.32)   | -3.43(-3.59,-3.27) | -2.87(-2.88,-2.87) |
| Eastern Sub-Saharan Africa | 5.01(4.03,6.03)    | 2.40(2.31,2.49)    | 1.80(1.27,2.33)   | -2.63(-2.72,-2.54) | -2.84(-2.88,-2.79) |

RHD, rheumatic heart disease; ASMRs, age-standardized mortality rates; EAPC, estimated annual percentage change; UI, uncertainty interval; CI, confidence interval; SDI, sociodemographic index.

**Table S6.** The RHD-related ASPRs of HF in 1990, 2020 and 2030, and its temporal trends from 1990 to 2019 and from 2020 to 2030.

| Characteristics | 1990                                 | 2020                                 | 2030                                 | 1990–2019                             | 2020–2030                             |
|-----------------|--------------------------------------|--------------------------------------|--------------------------------------|---------------------------------------|---------------------------------------|
|                 | ASPRs of HF per<br>100, 000 (95% UI) | ASPRs of HF per<br>100, 000 (95% CI) | ASPRs of HF per<br>100, 000 (95% CI) | EAPC about<br>ASPRs of HF<br>(95% CI) | EAPC about<br>ASPRs of HF<br>(95% CI) |
| <b>Global</b>   | 24.49(18.89,31.19)                   | 26.52(26.09,26.95)                   | 26.84(22.09,31.59)                   | 0.23(0.20,0.27)                       | 0.11(0.10,0.12)                       |
| <b>Sex</b>      |                                      |                                      |                                      |                                       |                                       |
| Female          | 28.87(22.15,37.07)                   | 31.81(31.26,32.35)                   | 32.23(26.17,38.29)                   | 0.28(0.23,0.32)                       | 0.12(0.11,0.13)                       |
| Male            | 19.49(15.19,24.80)                   | 20.70(20.38,21.02)                   | 20.60(17.06,24.14)                   | 0.21(0.19,0.24)                       | -0.05(-0.07,-0.04)                    |
| <b>SDI</b>      |                                      |                                      |                                      |                                       |                                       |
| High SDI        | 18.81(14.05,24.44)                   | 15.86(15.33,16.40)                   | 15.24(11.46,19.02)                   | -0.76(-0.84,-0.67)                    | -0.40(-0.43,-0.37)                    |
| High-middle SDI | 22.62(17.06,29.46)                   | 27.34(26.73,27.95)                   | 28.82(22.72,34.93)                   | 0.61(0.54,0.68)                       | 0.52(0.52,0.53)                       |
| Middle SDI      | 27.75(21.32,35.62)                   | 29.83(29.18,30.47)                   | 28.93(23.15,34.71)                   | 0.31(0.26,0.36)                       | -0.32(-0.33,-0.31)                    |
| Low-middle SDI  | 26.58(20.21,34.46)                   | 28.69(28.27,29.11)                   | 28.17(23.22,33.11)                   | 0.27(0.24,0.31)                       | -0.19(-0.20,-0.18)                    |

|                              |                    |                    |                    |                    |                    |
|------------------------------|--------------------|--------------------|--------------------|--------------------|--------------------|
| Low SDI                      | 22.96(17.09,30.27) | 24.14(23.80,24.48) | 23.66(19.87,27.44) | 0.25(0.22,0.27)    | -0.20(-0.21,-0.20) |
| <b>Regions</b>               |                    |                    |                    |                    |                    |
| High-income Asia Pacific     | 13.08(9.05,17.96)  | 10.73(10.31,11.15) | 10.86(7.58,14.14)  | -0.91(-1.01,-0.81) | 0.12(0.11,0.12)    |
| High-income North America    | 19.45(14.26,26.13) | 18.04(17.07,19.01) | 15.49(9.25,21.73)  | -0.01(-0.16,0.14)  | -1.52(-1.53,-1.52) |
| Western Europe               | 21.43(16.05,27.64) | 17.23(16.67,17.79) | 17.40(11.63,23.18) | -1.31(-1.53,-1.09) | 0.10(0.10,0.10)    |
| Australasia                  | 28.63(22.02,35.75) | 20.08(19.33,20.84) | 20.68(11.73,29.63) | -1.27(-1.39,-1.16) | 0.29(0.28,0.31)    |
| Eastern Europe               | 8.50(5.83,12.16)   | 8.21(8.01,8.41)    | 8.02(5.87,10.18)   | -0.22(-0.32,-0.11) | -0.23(-0.23,-0.22) |
| Central Europe               | 14.65(10.37,20.61) | 13.71(13.32,14.09) | 13.89(9.03,18.75)  | -0.19(-0.30,-0.07) | 0.14(0.12,0.15)    |
| Southern Latin America       | 14.79(10.03,20.82) | 15.06(14.64,15.48) | 16.83(13.05,20.61) | -0.05(-0.10,-0.01) | 1.12(1.04,1.19)    |
| East Asia                    | 42.59(33.36,54.08) | 48.76(47.42,50.10) | 49.76(36.43,63.10) | 0.50(0.44,0.57)    | 0.20(0.19,0.21)    |
| Central Asia                 | 9.85(7.12,13.30)   | 9.04(8.77,9.32)    | 8.82(6.67,10.97)   | -0.39(-0.49,-0.29) | -0.25(-0.26,-0.24) |
| North Africa and Middle East | 11.65(8.50,15.68)  | 11.87(11.67,12.07) | 12.11(9.97,14.26)  | 0.02(0.00,0.05)    | 0.20(0.20,0.21)    |
| Southeast Asia               | 9.00(6.76,11.71)   | 9.59(9.43,9.74)    | 9.63(8.00,11.26)   | 0.23(0.18,0.27)    | 0.05(0.05,0.05)    |
| Southern Sub-Saharan Africa  | 26.34(17.88,39.11) | 23.03(22.41,23.64) | 21.74(16.60,26.88) | -0.55(-0.62,-0.47) | -0.58(-0.58,-0.57) |

|                            |                    |                    |                    |                    |                    |
|----------------------------|--------------------|--------------------|--------------------|--------------------|--------------------|
| Tropical Latin America     | 6.02(4.20,8.20)    | 6.26(6.11,6.42)    | 6.45(5.05,7.86)    | 0.03(-0.04,0.09)   | 0.30(0.28,0.31)    |
| Andean Latin America       | 6.56(4.35,9.52)    | 8.71(8.40,9.01)    | 9.79(7.32,12.26)   | 0.87(0.84,0.90)    | 1.18(1.15,1.22)    |
| Caribbean                  | 8.26(6.11,11.00)   | 8.25(7.97,8.54)    | 8.34(6.31,10.38)   | 0.00(-0.02,0.01)   | 0.11(0.10,0.12)    |
| Central Latin America      | 7.88(5.45,10.77)   | 7.51(7.32,7.69)    | 7.49(5.75,9.23)    | -0.25(-0.30,-0.21) | -0.02(-0.03,-0.01) |
| South Asia                 | 30.83(23.30,39.84) | 32.38(31.93,32.83) | 32.32(27.03,37.60) | 0.13(0.10,0.17)    | -0.02(-0.03,-0.01) |
| Central Sub-Saharan Africa | 7.45(4.76,11.37)   | 7.30(7.03,7.57)    | 7.35(5.49,9.22)    | -0.15(-0.18,-0.11) | 0.08(0.07,0.08)    |
| Oceania                    | 36.20(27.70,46.89) | 39.49(37.98,40.99) | 39.99(29.78,50.21) | 0.31(0.27,0.34)    | 0.13(0.13,0.13)    |
| Western Sub-Saharan Africa | 36.16(25.44,50.65) | 38.96(38.26,39.66) | 39.39(31.61,47.18) | 0.38(0.30,0.46)    | 0.11(0.10,0.12)    |
| Eastern Sub-Saharan Africa | 2.20(1.43,3.35)    | 2.43(2.34,2.52)    | 2.47(1.83,3.11)    | 0.28(0.20,0.35)    | 0.13(0.13,0.13)    |

RHD, rheumatic heart disease; ASPRs, age-standardized prevalence rates; HF, heart failure; EAPC, estimated annual percentage change; UI, uncertainty interval; CI, confidence interval; SDI, sociodemographic index.



**Figure S1**

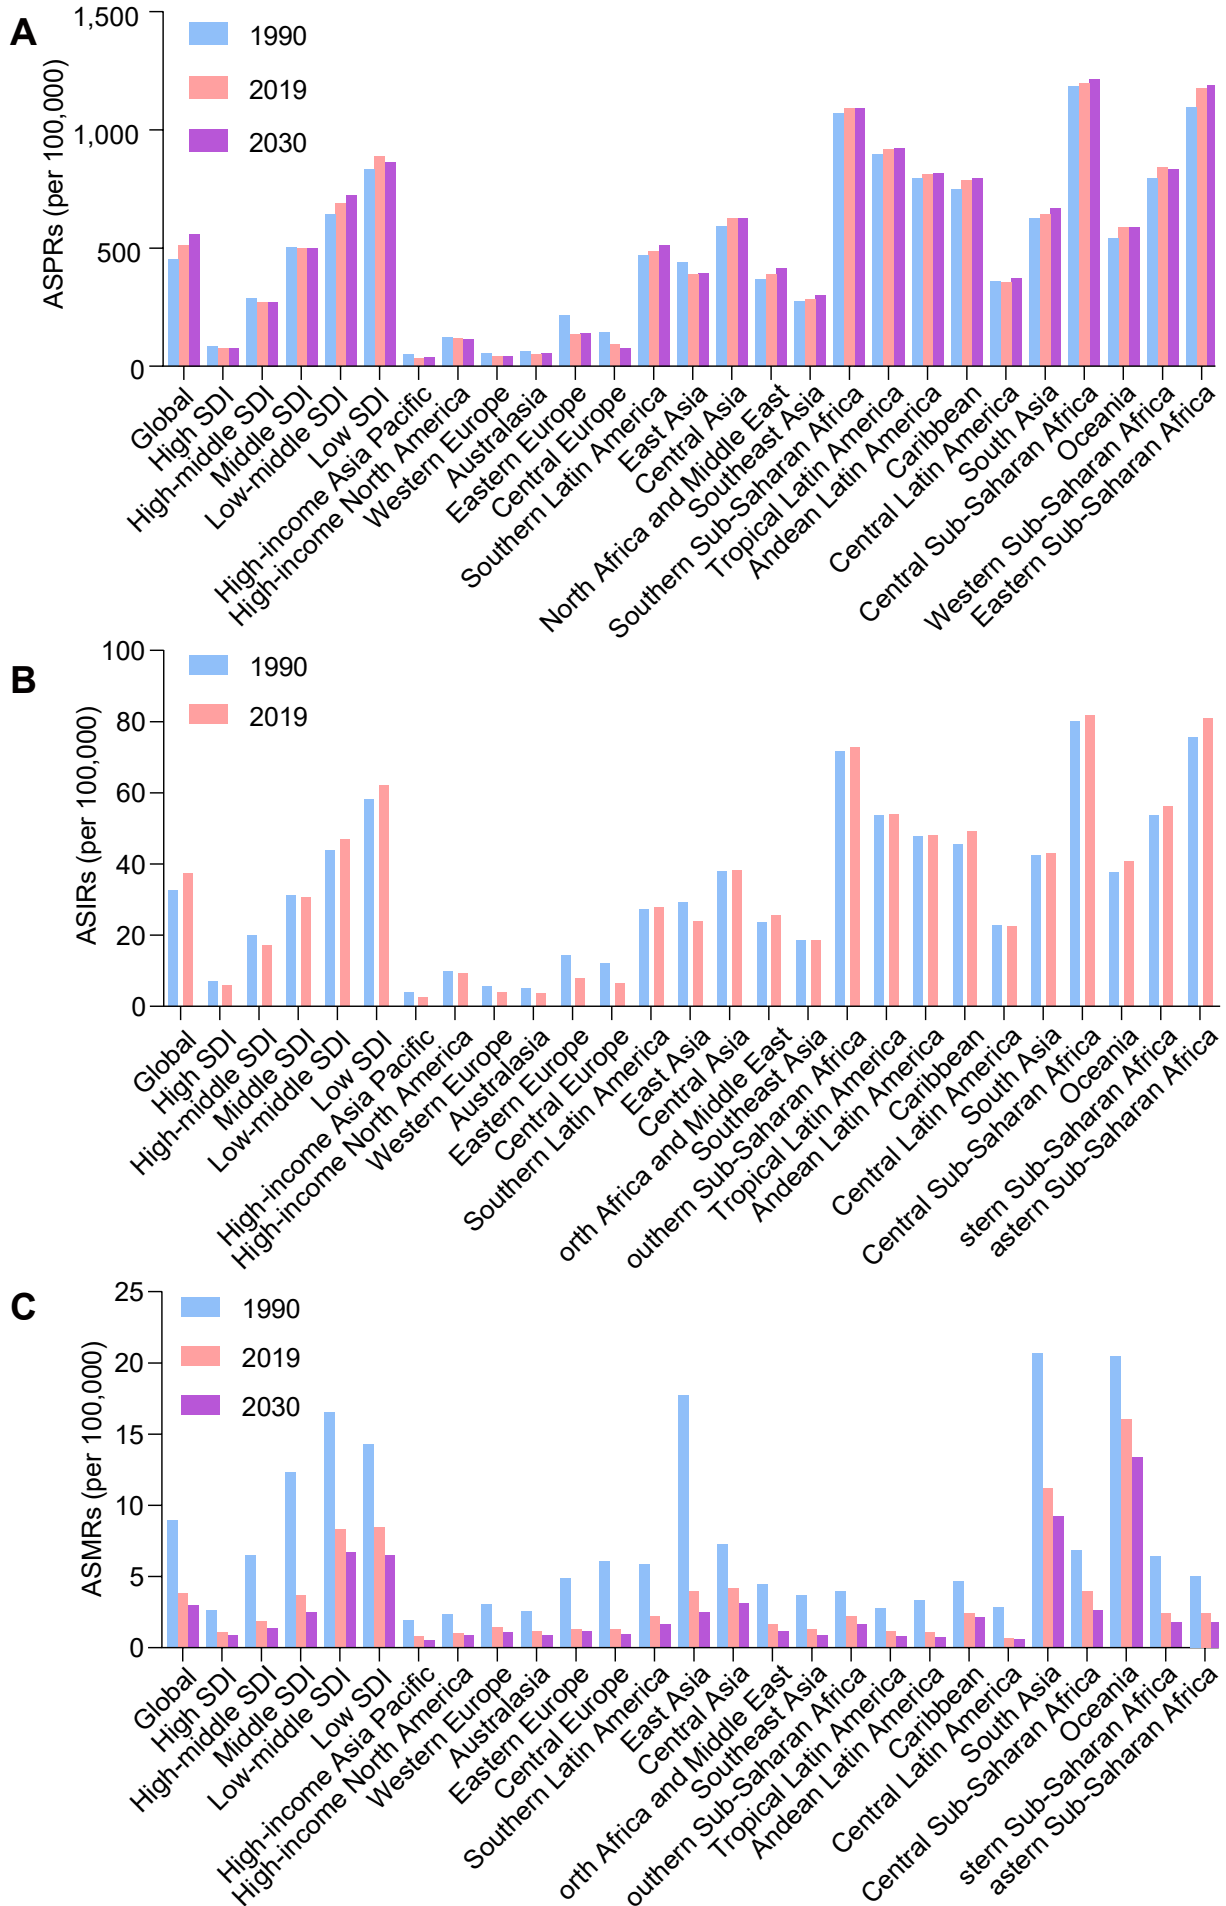

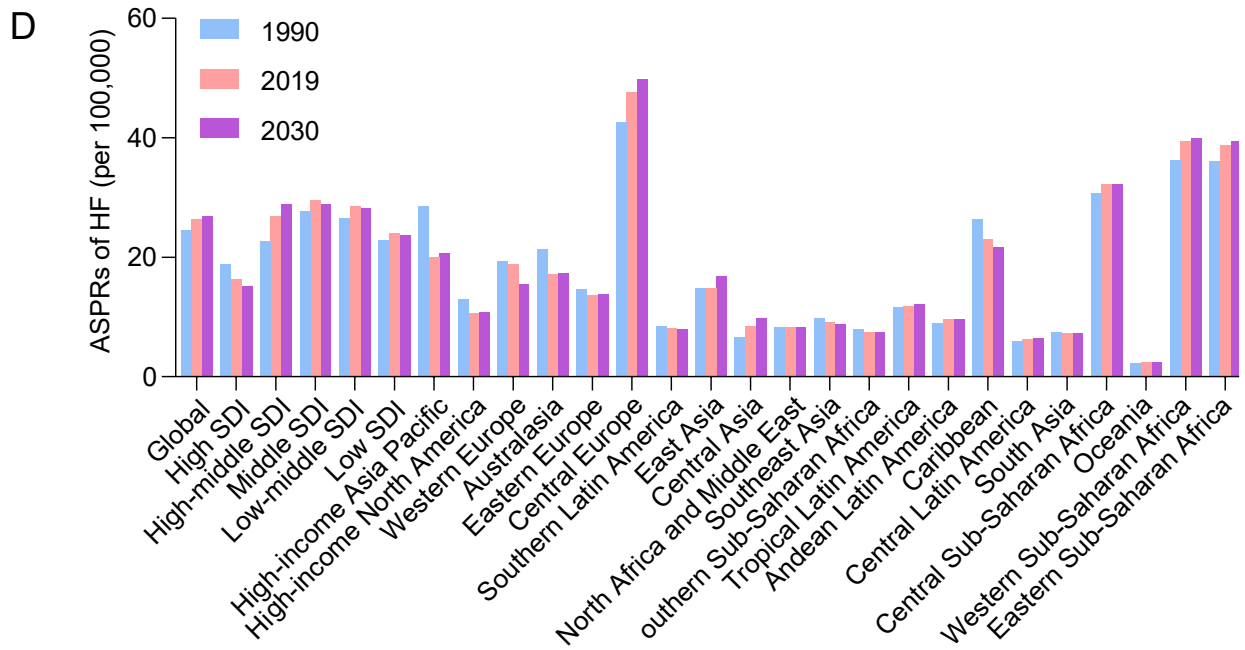

**Figure S1.** The RHD-related disease burden at the global level, in different SDI regions and in 21 GBD regions. (A) The ASPRs in 1990, 2019, and 2030. (B) The ASIRs in 1990 and 2019. (C) The ASMRs in 1990, 2019, and 2030. (D) The ASPRs of HF in 1990, 2019, and 2030. RHD, rheumatic heart disease; SDI, sociodemographic index; GBD, global burden of disease; ASPRs, age-standardized prevalence rates; ASIRs, age-standardized incidence rates; ASMRs, age-standardized mortality rates; HF, heart failure.

**Figure S2**

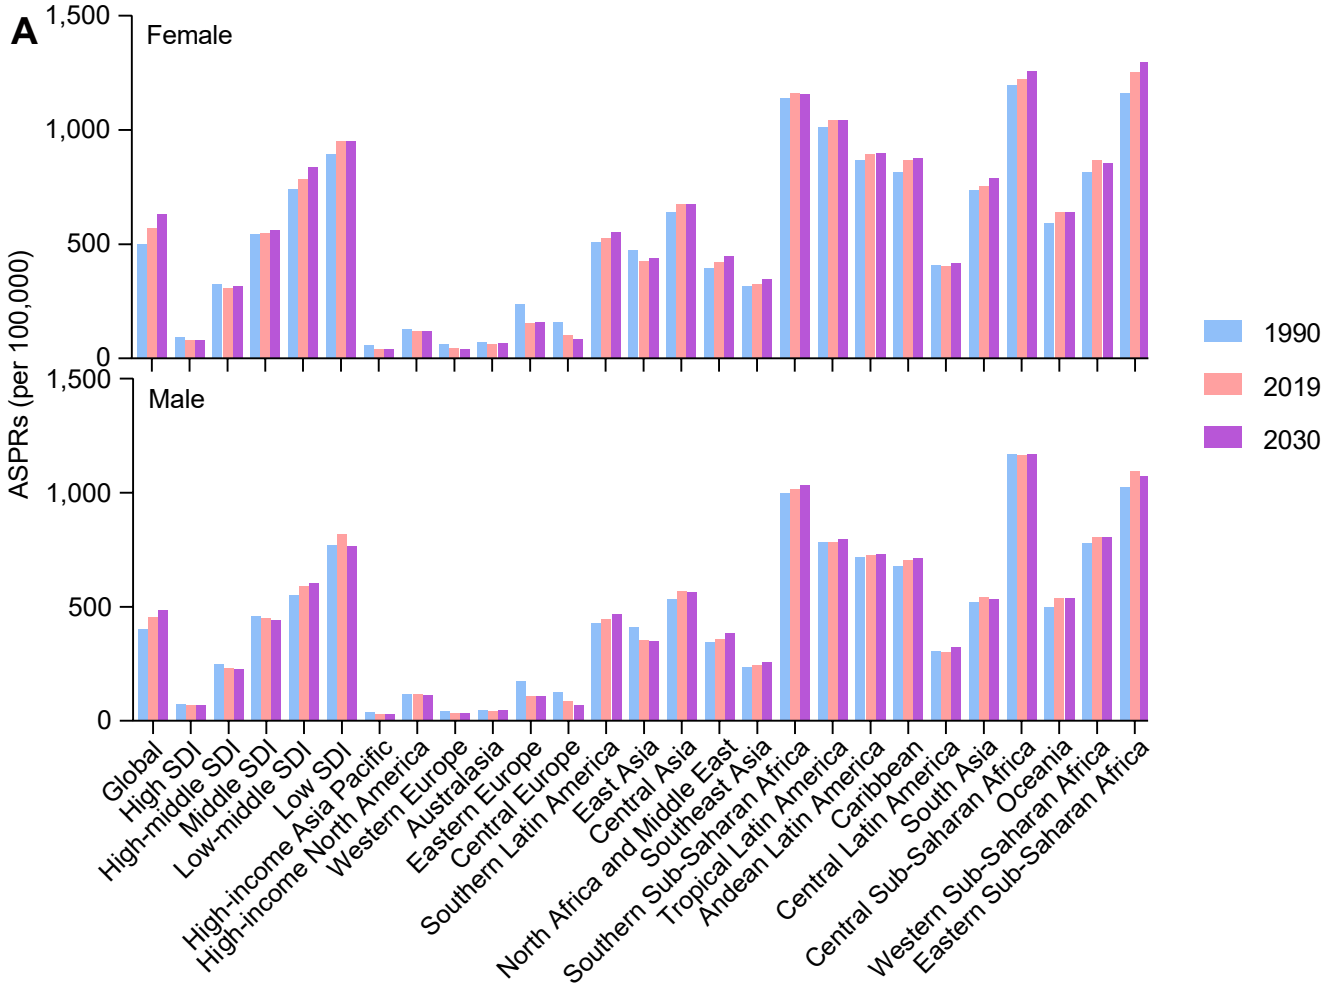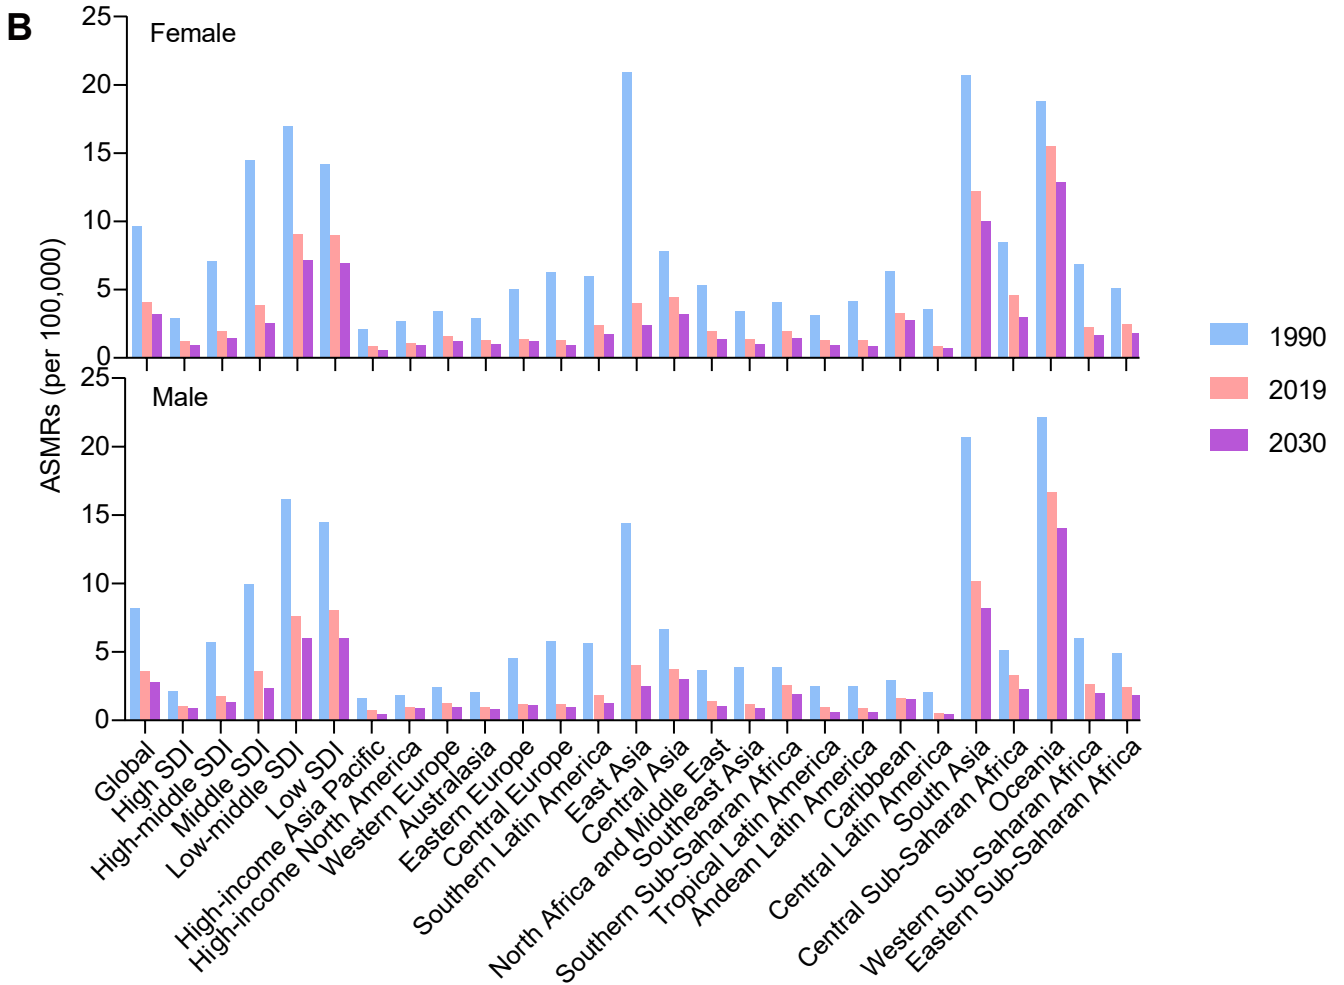

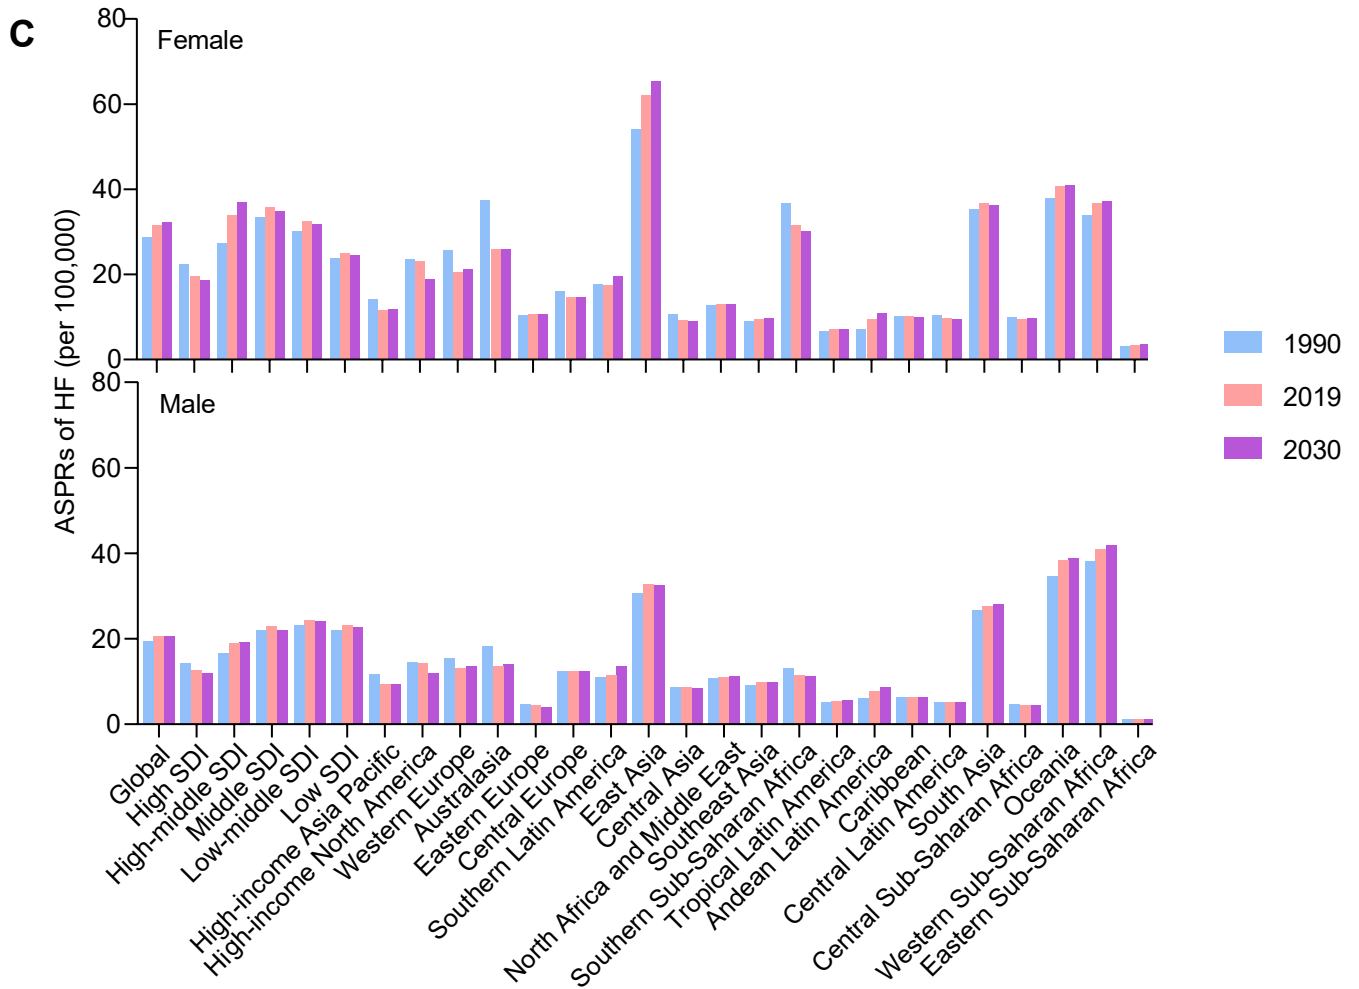

**Figure S2.** The RHD-related disease burden at the global level, in different SDI regions and in 21 GBD regions by sex. (A) The ASPRs in 1990, 2019, and 2030. (B) The ASMRs in 1990, 2019, and 2030. (C) The ASPRs of HF in 1990, 2019, and 2030. RHD, rheumatic heart disease; SDI, sociodemographic index; GBD, global burden of disease; ASPRs, age-standardized prevalence rates; ASMRs, age-standardized mortality rates; HF, heart failure.

**Figure S3**

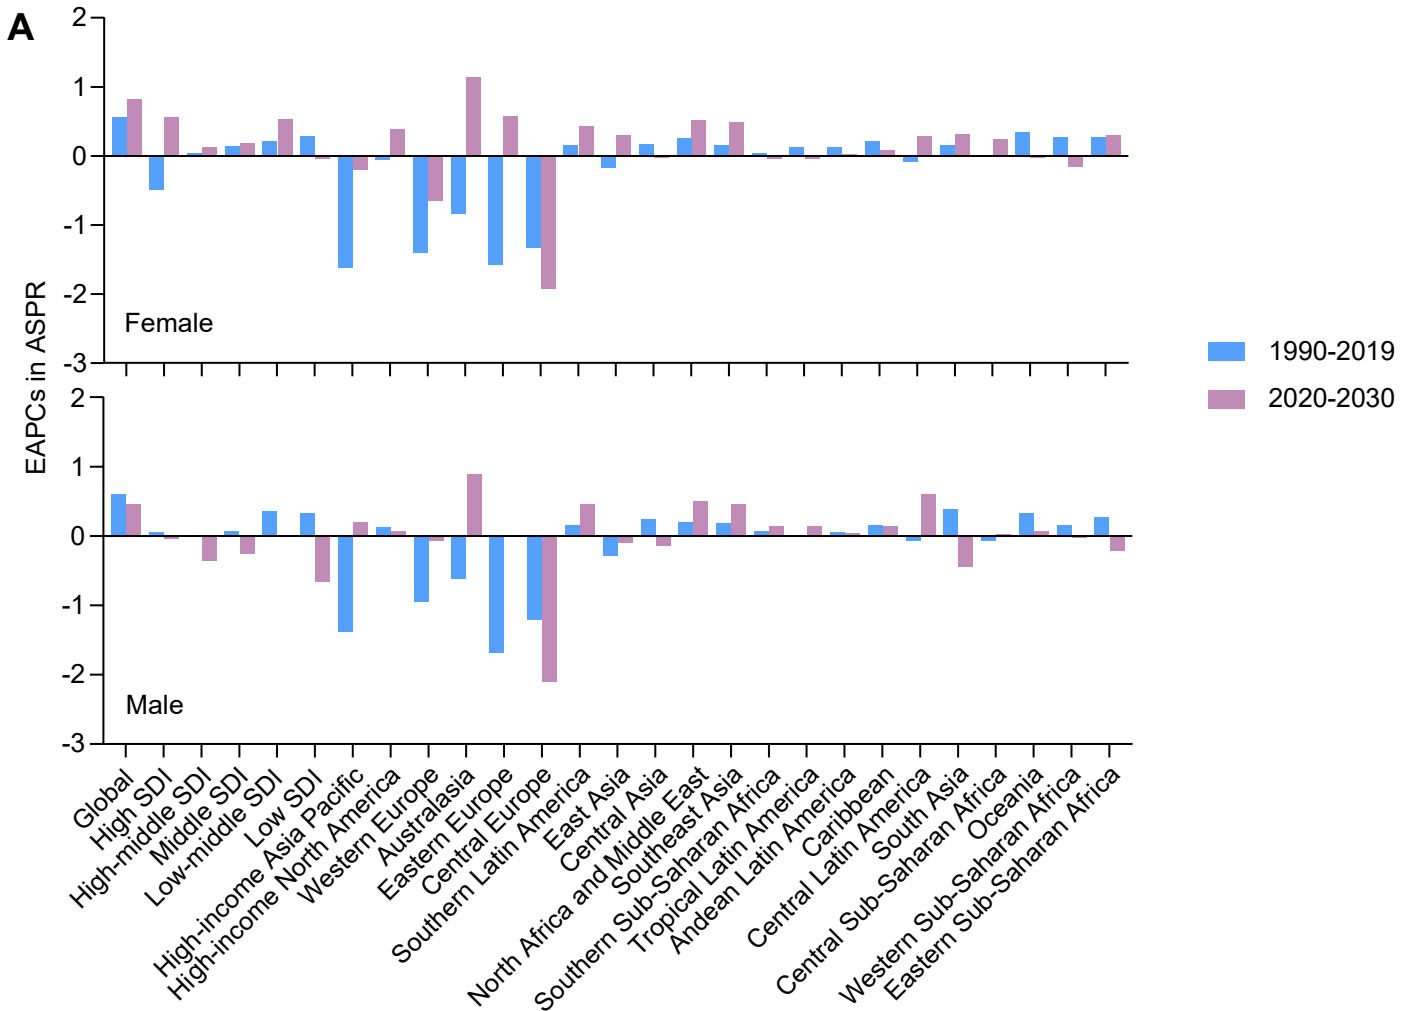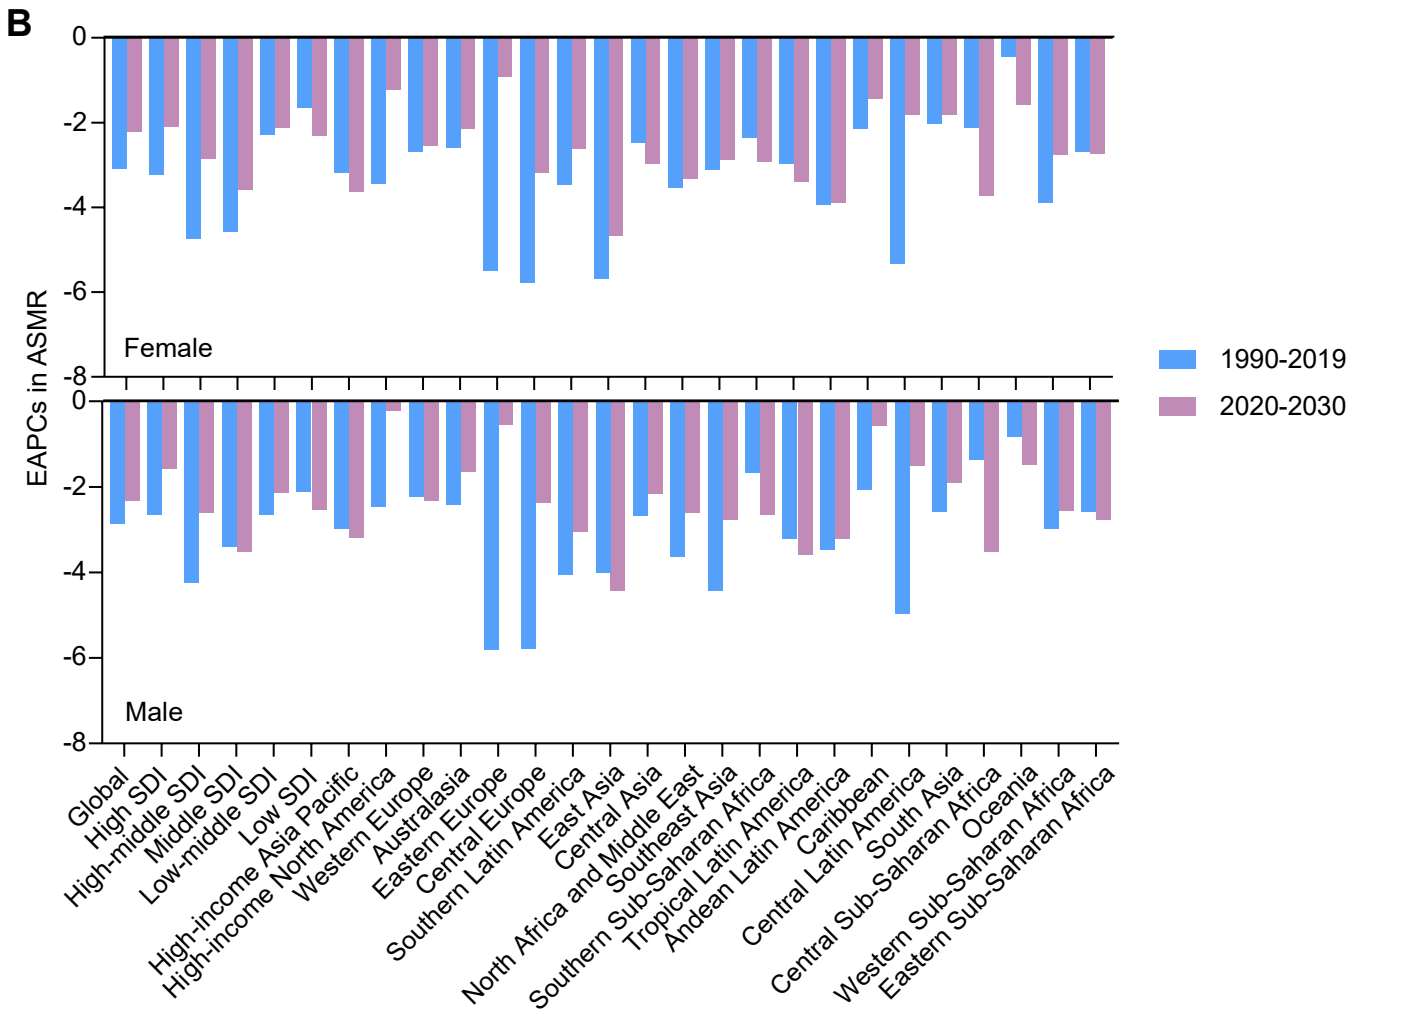

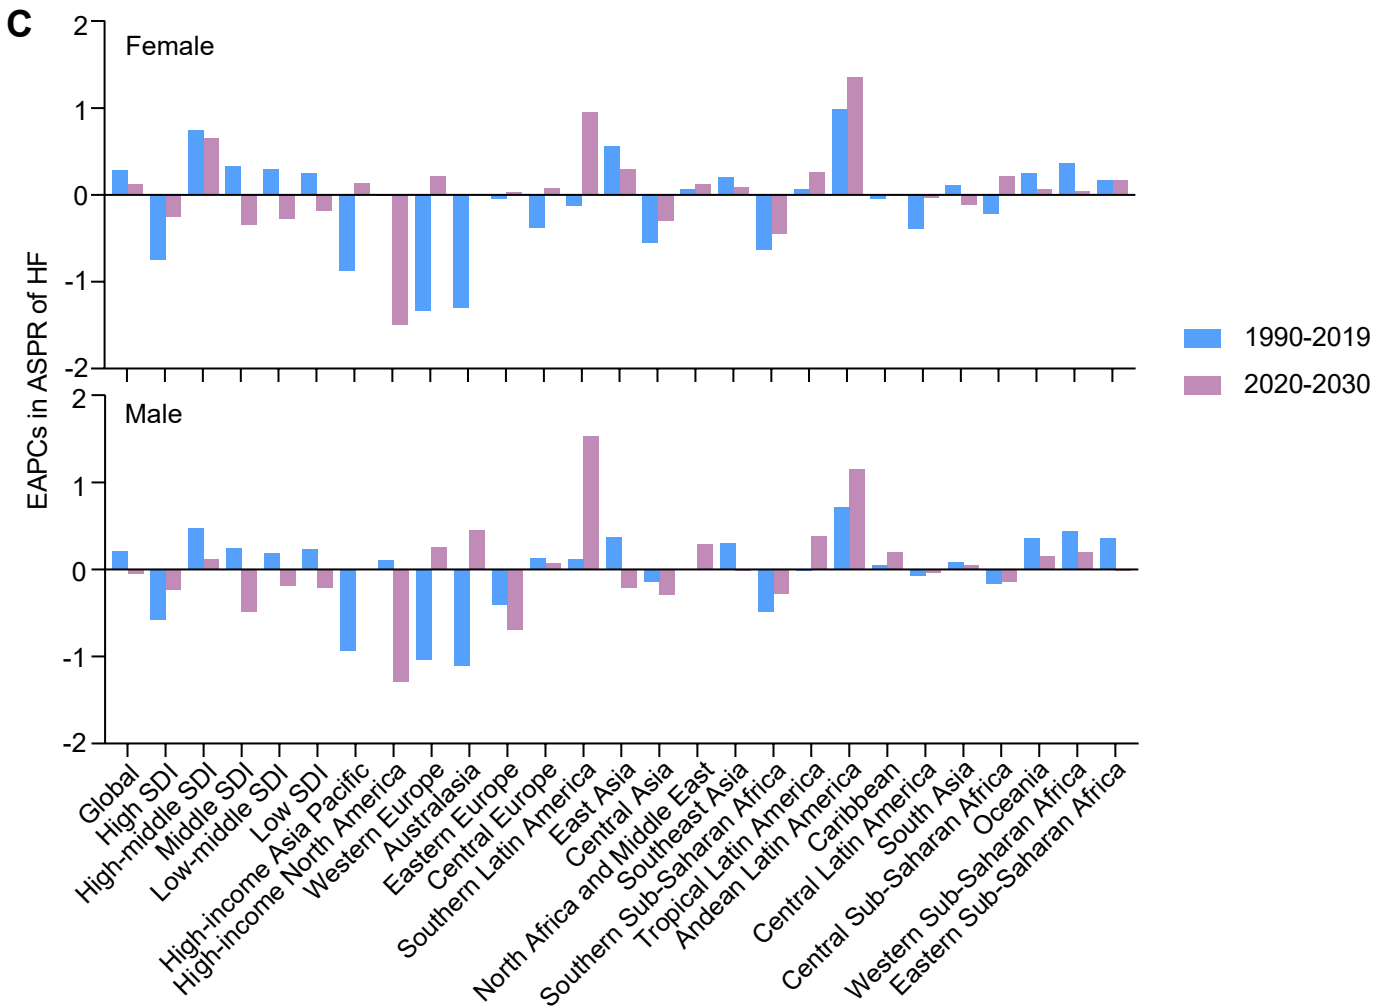

**Figure S3.** The change trends of the RHD-related disease burden at the global level, in different SDI regions and in 21 GBD regions by sex. (A) The EAPCs in ASPR between 1990-2019 and 2020-2030. (B) The EAPCs in ASMR between 1990-2019 and 2020-2030. (C) The EAPCs in ASPR of HF between 1990-2019 and 2020-2030. RHD, rheumatic heart disease; SDI, sociodemographic index; GBD, global burden of disease; EAPCs, estimated annual percentage changes; ASPR, age-standardized prevalence rate; ASMR, age-standardized mortality rate; HF, heart failure.

**Figure S4**

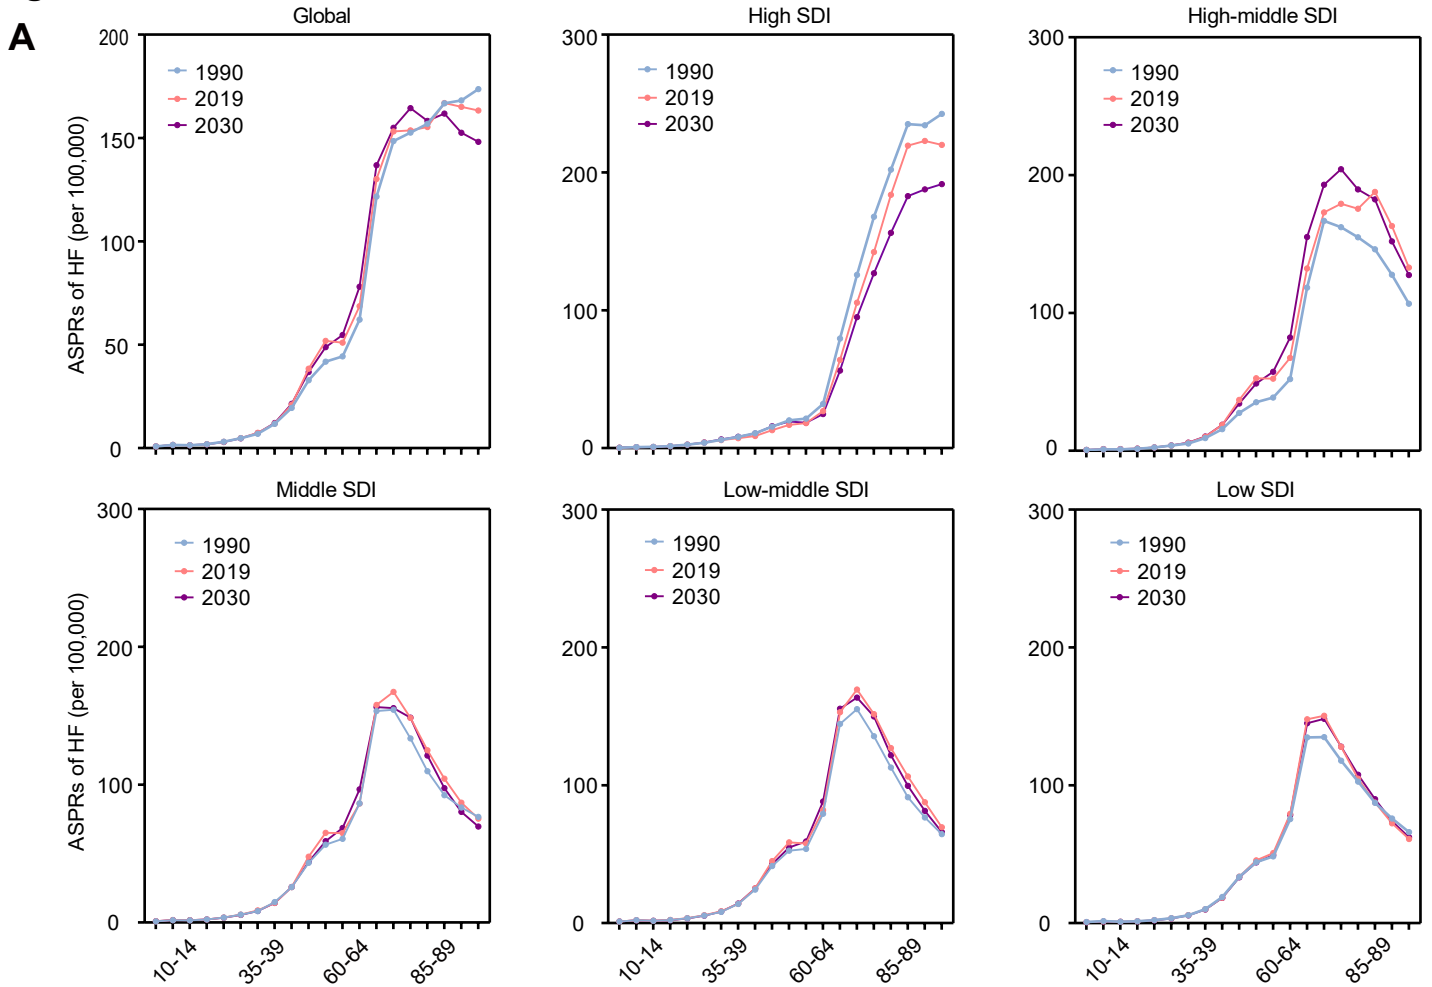

**Figure S4.** The ASPRs of RHD-related HF in 1990, 2019 and 2030 at the global level and in different SDI regions by age. ASPRs, age-standardized prevalence rates; RHD, rheumatic heart disease; HF, heart failure; SDI, sociodemographic index.
